# 1 Chemogenetic silencing of neurons in the mouse 2 anterior cingulate area modulates neuronal activity and 3 functional connectivity

4 Lore M. Peeters<sup>\*a</sup>, Rukun Hinz<sup>a</sup>, Jan R. Detrez<sup>b</sup>, Stephan Missault<sup>a</sup>, Winnok H. De Vos<sup>b</sup>, Marleen  
5 Verhoye<sup>a</sup>, Annemie Van der Linden<sup>a</sup>, Georgios A. Keliris<sup>\*a</sup>

6 <sup>a</sup> Bio-Imaging Lab, University of Antwerp, Universiteitsplein 1 2610 Wilrijk, Belgium

7 <sup>b</sup> Laboratory for Cell Biology and Histology, University of Antwerp, Universiteitsplein 1 2610 Wilrijk,  
8 Belgium

9 \*Corresponding authors:

10 Lore M. Peeters  
11 Bio-Imaging lab, University of Antwerp  
12 Campus Drie Eiken – Building UC 1.17  
13 Universiteitsplein 1 – 2610 Wilrijk – Belgium  
14 Tel. +32 2651816  
15 e-mail: [lore.peeters@uantwerpen.be](mailto:lore.peeters@uantwerpen.be)

16 or

17 Georgios A. Keliris  
18 Bio-Imaging Lab, University of Antwerp  
19 Campus Drie Eiken – Building UC 1.17  
20 Universiteitsplein 1 – 2610 Wilrijk – Belgium  
21 Tel. +32 2652772  
22 e-mail: [georgios.keliris@uantwerpen.be](mailto:georgios.keliris@uantwerpen.be)

23  
24  
25

26 **Keywords:** Designer Receptors Exclusively Activated by Designer Drugs (DREADDs), kappa-opioid  
27 receptor DREADDs (KORD), pharmacological functional MRI, resting state functional MRI, neuronal  
28 activity, functional connectivity.

29 **Abstract**

30 The anterior cingulate area (ACA) is an integral part of the prefrontal cortex in mice and has been  
31 implicated in several cognitive functions. Previous anatomical and functional imaging studies  
32 demonstrated that the ACA is highly interconnected with numerous brain regions acting as a hub region  
33 in functional networks. However, the importance of the ACA in regulating functional network activity and  
34 connectivity remains to be elucidated. Recently developed neuromodulatory techniques, such as Designer  
35 Receptors Exclusively Activated by Designer Drugs (DREADDs) allow for precise control of neuronal  
36 activity. In this study, we used an inhibitory kappa-opioid receptor DREADDs (KORD) to temporally inhibit  
37 neuronal firing in the right ACA of mice and assessed functional network activity and connectivity using  
38 non-invasive functional MRI. We demonstrated that KORD-induced inhibition of the right ACA induced  
39 blood oxygenation-level dependent (BOLD) signal decreases and increases in connected brain regions  
40 throughout of hemispheres. Furthermore, these modulations in neuronal activity were associated with  
41 decreased intra- and interhemispheric functional connectivity. These results demonstrate that the  
42 combination of the DREADD technology and non-invasive functional imaging methods is a valuable tool  
43 for unraveling the underlying mechanisms of network function and dysfunction.

44

45

46 **1. Introduction**

47 The anterior cingulate area (ACA) is an integral part of the prefrontal cortex and has been implicated in  
48 several cognitive functions including attention [1-3], remote memory [4, 5], motion planning and  
49 execution [6] and processing of pain [7]. Accumulating evidence suggests that the cytoarchitecture and  
50 functional role of the ACA is similar across different species including humans, non-human primates and  
51 rodents [8-11]. Anatomical and functional imaging studies identified the ACA as a central hub region that  
52 is highly interconnected with numerous brain regions and involved in multiple functional networks [12-  
53 14]. ACA hypoconnectivity, as measured in functional MRI studies, is associated with network  
54 dysfunctions implicated in multiple psychiatric disorders, such as attention-deficit hyperactivity disorder  
55 [15], schizophrenia [16, 17], bipolar disorder [18, 19], depression and anxiety [20]. Furthermore,  
56 abnormal functional connectivity (FC) of the ACA has also been shown to occur following traumatic brain  
57 injury [21, 22]. This implicates that the ACA is involved in a wide range of neurological disorders.  
58 Nevertheless, the direct role of neuronal populations in the ACA in maintaining neuronal network function  
59 has not yet been examined to date.

60 During the last decade, researchers have focused on the development of new neuromodulatory tools,  
61 such as optogenetics and chemogenetics, which allow controlling the activity of specifically targeted  
62 neuronal populations with spatiotemporal specificity. Current chemogenetic tools include Designer  
63 Receptors Exclusively Activated by Designer Drugs (DREADDs), which are engineered receptors for  
64 targeted enhancement or silencing of neurons upon binding of an otherwise inert ligand. The combination  
65 of chemogenetics and non-invasive neuroimaging methods, such as functional magnetic resonance  
66 imaging (fMRI), allows direct evaluation of DREADD-induced changes in neuronal firing on large-scale  
67 neuronal activity and FC. As such, Giorgi et al. were able to causally link the chemogenetic activation of  
68 serotonergic neurons with neuronal activity increases in cortical and subcortical brain areas, measured by  
69 relative cerebral blood volume increases [23]. Furthermore, other studies also used blood-oxygenation-

70 level-dependent (BOLD) fMRI to identify the effect of chemogenetic activation of mesolimbic and  
71 mesocortical pathways [24] or chemogenetic inhibition of the amygdala [25] on whole-brain network  
72 integrity.

73 Here, we combined inhibitory kappa opioid-receptor DREADDs (KORD) in the mouse ACA and non-invasive  
74 fMRI in order to evaluate the link between inhibition of the ACA and whole-brain network activity and  
75 connectivity. We hypothesized that acute inhibition of the ACA leads to neuronal activity and FC  
76 alterations in structurally and functionally connected brain regions. Pharmacological MRI (phMRI) was  
77 used to assess changes in BOLD activation levels after injection of the chemogenetic agent, Salvinorin B  
78 (SalB), an inert ligand of the KORD. Changes in neuronal activity were evaluated in the target region as  
79 well as in connected brain areas. Resting state fMRI (rsfMRI) was used to identify brain wide FC alterations  
80 that may reflect neuronal network reorganizations and disruptions similar to disease states.

## 81 **2. Methods**

### 82 ***2.1 Animals and ethics statement***

83 Healthy male C57BL/6J mice (N = 18; Janvier, France) of (34 ± 1) g were used in the study. Animals were  
84 group housed under controlled humidity (40%) and temperature (20 – 24°C) conditions, with a 12h  
85 light/dark cycle. Standard food and water were provided ad libitum. All procedures were in accordance  
86 with the guidelines approved by the European Ethics Committee (decree 2010/63/EU) and were approved  
87 by the Committee on Animal Care and Use at the University of Antwerp, Belgium (approval number: 2016-  
88 49).

### 89 ***2.2 Intracerebral viral vector injections***

90 Mice were subjected to a stereotactic surgery targeting the right ACA (AP +0.86 mm, ML +0.50 mm, DV -  
91 0.75 mm). Mice were randomly divided into two groups: a KORD-expressing group (N=12) and a sham  
92 group (N=6). Viral vector injections were performed as follows: mice were anesthetized using 2%

93 isoflurane (Isoflo<sup>®</sup>, Abbott Laboratories Ltd., USA) and received a subcutaneous (s.c.) injection of xylocaine  
94 (Lidocaine hydrochloride, Astra Zeneca) for local analgesia. The following viral vectors were injected: 1  $\mu$ L  
95 of  $3.3 \times 10^{12}$  vector genomes (vg)/mL of AAV8-CaMKII-HA-KORD-IRES-mCitrine (Vector Core, University of  
96 North Carolina, USA) in the KORD-expressing group, and 1  $\mu$ L of  $5.6 \times 10^{12}$  vg/mL of AAV8-CaMKIIa-EGFP  
97 (Vector Core, University of North Carolina, USA) in the sham group. The virus was injected at a rate of 18.3  
98 nL/min with a nano-injector (Nanoject II, Drummond). The MRI experiments started at least three weeks  
99 after viral vector injection to allow optimal expression levels [26].

### 100 **2.3 In vivo MRI procedures**

101 Initially, mice were anesthetized with 2% isoflurane in a mixture of 70% N<sub>2</sub> and 30% O<sub>2</sub>. During the imaging  
102 procedures, an optimized anesthesia protocol was used [27]. Briefly, a s.c. bolus injection of 0.05 mg/kg  
103 medetomidine (Domitor<sup>®</sup>, Pfizer, Germany) was administered, and after 10 min a s.c. infusion of 0.1  
104 mg/kg/h medetomidine was started. Meanwhile, the isoflurane level was gradually decreased to 0.3%.  
105 Functional imaging scans were acquired starting from forty minutes post-bolus injection. The animals'  
106 physiology was closely monitored throughout the acquisition of the MRI scans. The breathing rate was  
107 recorded using a pressure-sensitive pad (sampling rate 225 Hz; MR-compatible Small Animal Monitoring  
108 and Gating system, SA Instruments, Inc., USA) and the body temperature was maintained at  $(37 \pm 0.5)$  °C  
109 using a feedback controlled warm air circuitry (MR-compatible Small Animal Heating System, SA  
110 Instruments, Inc., USA). In addition, the level of blood oxygenation was monitored using a pulse oximeter  
111 (MR-compatible Small Animal Monitoring and Gating System, SA Instruments, Inc., USA). After the  
112 imaging procedures, the medetomidine anesthesia was reversed by injecting 0.1 mg/kg atipamezole  
113 (Antisedan<sup>®</sup>, Pfizer, Germany).

114 All MRI scans were acquired on a 9.4T Biospec MRI system (Bruker BioSpin, Germany) with Paravision  
115 6.0.1 software. The images were acquired using a standard Bruker crosscoil set-up with a quadrature  
116 volume coil and a quadrature surface coil designed for mice. First, three orthogonal multi-slice Turbo RARE

117 T<sub>2</sub>-weighted images were acquired to enable uniform slice-positioning (TR: 2000 ms, TE: 33 ms, matrix:  
118 [256x256], FOV: (20x20) mm<sup>2</sup>, in-plane resolution: (0.078x0.078) mm<sup>2</sup>, 16 coronal slices of 0.4 mm). Then,  
119 inhomogeneity of the magnetic field in an ellipsoidal volume of interest within the brain was corrected by  
120 local shimming. The phMRI scans and rsfMRI scans were acquired during separate scan sessions.

## 121 **2.4 Assessing KORD-induced neuronal activity changes**

### 122 *2.4.1 MRI data Acquisition*

123 PhMRI data were acquired using a T<sub>2</sub>\* weighted echo planar imaging (EPI) sequence (TR: 15000 ms, TE: 20  
124 ms, matrix: [64x64], FOV: (20x20) mm<sup>2</sup>, two segments, in-plane resolution: (0.312x0.312) mm<sup>2</sup>, 16 coronal  
125 slices of 0.4 mm covering cerebrum excluding olfactory bulb). Baseline scans were acquired for 10 min (20  
126 volumes) after which SalB (3 mg/kg (sham and KORD group) or 6 mg/kg (KORD group); Toronto Research  
127 Chemicals, Canada; dissolved in DMSO, as previously described in [26]) was administered through a s.c.  
128 catheter. Following the acquisition of the ten minutes baseline scan, the scan was continued until fifty  
129 minutes (100 volumes) after the SalB injection. The KORD group was scanned with different SalB  
130 concentrations (3 mg/kg and 6 mg/kg, separate scan sessions) to assess concentration effects. A total of  
131 three scans, two scans from the sham group and one scan from the 3 mg/kg SalB KORD group, were  
132 excluded from the phMRI analysis due to signal instabilities. Final group sizes for the phMRI scans were:  
133 sham group: N=4 and KORD-expressing group: 3mg/kg SalB N=11, 6 mg/kg SalB N=12.

### 134 *2.4.2 MRI data pre-processing*

135 Data pre-processing was performed using SPM12 software in MATLAB 2014a. Realignment and unwarping  
136 were performed using a least-squares approach and a 6-parameter rigid body spatial transformation.  
137 Second, all scans were normalized to the study-specific mean EPI template using a global 12-parameter  
138 affine transformation, followed by a non-linear transformation. Then, in-plane smoothing was performed  
139 on masked images with a Gaussian kernel with full width at half maximum of twice the voxel size.

### 140 2.4.3 MRI data analysis

141 The scans of the sham group were used to assess potential non-specific effects of SalB and its solvent  
142 DMSO on the BOLD signal. Previous studies reported that SalB is an inactive metabolite of the KOR-  
143 selective agonist Salvinorin A [26, 28]. However, DMSO has been shown to be able to modulate central  
144 nervous system function [29]. To estimate this effect, we used the sham group that didn't express designer  
145 receptors that could be affected by SalB/DMSO. Specifically, the BOLD signal from each voxel was  
146 converted to percent signal change using the pre-injection baseline volumes (volumes 1-20) as a  
147 reference. Then, the percent BOLD signal change across all sham animals were voxel-wise averaged to  
148 create an average sham percent BOLD signal change scan. The resulting average percent BOLD signal  
149 change timeseries showed a small linear signal drift before the injection (commonly observed drift in MRI  
150 imaging), while after the injection an exponential-like decline indicated unspecific effects of SalB/DMSO.  
151 These effects were fitted for each voxel by a linear fit with parameters  $a$ ,  $b$  (volumes 5-20, given by  
152 equation (1)) and a double exponential fit with parameters  $c$ ,  $d$ ,  $f$  and  $g$  (volumes 25-120, given by equation  
153 (2)), which were connected at their crossing point to determine the final fitted curves (see Supplementary  
154 figure 1):

$$155 \quad \Delta S(t) = a \cdot t + b \quad (1)$$

$$156 \quad \Delta S(t) = c \cdot e^{d \cdot t} + f \cdot e^{g \cdot t} \quad (2)$$

157 To identify the specific effects of the SalB injection in the KORD groups we calculated the differences  
158 between the timeseries (percent signal change) of the KORD-expressing animals and the averaged sham  
159 fits. To be certain that our fitting procedures closely reflected the BOLD activity in the sham group, we  
160 only considered voxels with very high goodness of fit ( $R^2 \geq 0.85$ , Supplementary figure 1). Then, the area  
161 under the curve (AUC) for the period starting at 10 min after SalB injection until 50 min post-injection  
162 (volumes 40-120) was calculated in the KORD groups and used in further statistical analyses. For each SalB

163 concentration, mean statistical maps (one sample Student's T-test) were computed to test whether the  
164 AUC values were statistically different from zero. In addition, a Paired Student's T-test was performed to  
165 compare the effects of the two SalB concentrations in the KORD scan sessions. Next, regions of interest  
166 (ROIs) were selected based on the Franklin and Paxinos mouse brain atlas (third edition) in various brain  
167 regions, including: anterior cingulate area (ACA), retrosplenial cortex (RSP), insular cortex (Ins), visual  
168 cortex (VIS), somatosensory cortex (SS), auditory cortex (AUD) / temporal association cortex (TEA),  
169 amygdalar nuclei (AN) and hippocampus (HIP) (Supplementary Figure 2).

## 170 **2.5 Investigating KORD-induced functional connectivity changes**

### 171 *2.5.1 MRI data acquisition*

172 Resting state scans were acquired using a  $T_2^*$  weighted single shot EPI sequence (TR: 2000 ms, TE: 16 ms,  
173 matrix: [128x64], FOV: (20x20) mm<sup>2</sup>, in-plane resolution: (0.156x0.312) mm<sup>2</sup>, 16 coronal slices of 0.4 mm  
174 covering cerebrum excluding olfactory bulb). Two consecutive five-minute rsfMRI scans (150 volumes  
175 each) were acquired starting ten minutes after the injection of either vehicle (DMSO) or SalB (3mg/kg).  
176 The vehicle and SalB were used in MRI sessions. For the analysis, we selected the first of the two five-  
177 minute scans unless excessive motion was observed, in which case the second scan was used (N=2). The  
178 rsfMRI scans were acquired only in the KORD-expressing group.

### 179 *2.5.2 MRI data pre-processing*

180 The rsfMRI scans were pre-processed using SPM12 software in MATLAB2014a. Realignment was  
181 performed using a least-squares approach and a 6-parameter rigid body spatial transformation. Further  
182 pre-processing steps, consisting of normalization and smoothing, are analogous to the pHMRI pre-  
183 processing steps described above. The REST toolbox (REST 1.8, <http://resting-fmri.sourceforge.net>) was  
184 used to filter the rsfMRI data. The band-pass filter was set between 0.01 and 0.1Hz to retain the low  
185 frequency fluctuations of the BOLD signals.



### 186 2.5.3 MRI data analysis

187 Seed-based analyses were performed to assess FC alterations between brain regions that are known to  
188 anatomically or functionally connect to the ACA. As such, seeds, consisting of 4 voxels, were drawn in the  
189 ACA, RSP, Ins, VIS, SS, AUD/TEA, HIP and thalamus (Thal) for both hemispheres separately (Supplementary  
190 Figure 3). The REST toolbox was used to obtain the mean BOLD signal time course of a seed region. Then,  
191 this temporal signal was used in a general linear model analysis to compare it to the timecourse of all  
192 other voxels in the brain. This resulted in a FC map consisting of voxels that significantly correlate with the  
193 temporal signal of the seed region. Group mean FC maps were calculated for each seed region (One  
194 sample Student's T-test). Masks were created consisting of the significant clusters of the mean group FC  
195 maps of the vehicle scans and SalB scans (uncorrected  $p \leq 0.001$ , minimal cluster size = 10 voxels). The  
196 masks of both scans were summed and these total masks were used in further analyses. Mean T-values  
197 were extracted from the total masks. A Paired Student's T-test was used to compare the mean T-values  
198 between both conditions. To assess interhemispheric FC, ROI time courses were extracted and Pearson's  
199 correlation coefficients were calculated for each pair of ROIs. Then, the correlation values were z-  
200 transformed and differences between the two conditions were assessed using a paired Student's T-test.

## 201 2.6 Whole-brain microscopy

### 202 2.6.1 Clearing and image acquisition

203 After the in vivo imaging procedures, brain samples were collected to evaluate KORD expression. Mice  
204 were deeply anesthetized by an intraperitoneal injection with pentobarbital (Dolethal®, Vetoquinol,  
205 Belgium). Cardiac perfusion, brain tissue preparation and clearing were done using the uDISCO protocol  
206 [30]. Cleared mouse brains were recorded on an Ultramicroscope II (Lavision Biotec GmbH), equipped  
207 with an Olympus MVPLAPO 2X (NA 0.50) objective lens and DBE-corrected LV OM DCC20 dipping cap.  
208 Images were acquired with a Neo sCMOS camera (Andor) at 1.6X magnification and a 10 $\mu$ m z-step

209 resulting in a voxel size of 2  $\mu\text{m}$  x 2  $\mu\text{m}$  x 10  $\mu\text{m}$ . Images acquired with left and right light sheet illumination  
210 were merged with a linear blending algorithm. A 488nm (for EGFP and mCitrine) and 561nm laser (for  
211 autofluorescence) with a 525/50nm and 620/60nm emission filters were used.

### 212 *2.6.2 Image analysis*

213 Regional analysis of the EGFP and mCitrine expression was done as previously described [31]. Briefly, the  
214 autofluorescence channel was aligned to a 3D autofluorescence reference brain atlas (Allen Brain atlas)  
215 using Elastix, and the resulting transformation vector was used for regional analysis of the fluorescent  
216 protein signal [32]. To segment the fluorescent protein signal, a ratio image was generated by dividing the  
217 signal channel by the autofluorescent channel in FIJI [33]. Edges were subsequently enhanced by applying  
218 a Laplace filter (radius 75  $\mu\text{m}$ ), and binarized using a user-defined intensity threshold. Spurious signals  
219 (e.g. at the contours of the brain, and edges within the tissue) were manually removed. Finally, the total  
220 number of detected voxels for a given brain region volume was calculated and expressed relative to the  
221 brain region size (Supplementary Figure 4).

## 222 **3. Results**

223 Post-mortem whole-brain imaging after brain clearing (uDISCO) demonstrated that the targeted injection  
224 site overlaps with the ACA region of the right hemisphere in both the sham group and the KORD-  
225 expressing group (Supplementary Figure 4). Regional quantification of the mCitrine fluorescence showed  
226 that significant signal from the KORD expression could only be observed in the target region. However,  
227 similar injections of the EGFP control virus elicited stronger fluorescence that in addition to the target  
228 region could also be observed in projecting regions, including motor and somatosensory regions,  
229 retrosplenial cortex, insular cortex, thalamic nuclei and caudate putamen, with spreading to the  
230 contralateral hemisphere.

231 **3.1 Large scale network modulations upon KORD-induced neuronal inhibition in the right anterior**  
232 **cingulate area**

233 Pharmacological MRI was performed to assess in which brain regions the neural activity was modified  
234 upon chemogenetic inhibition of the neurons in the right ACA. The mean statistical difference maps from  
235 the comparison of both SalB concentrations in the KORD-expressing mice showed no significant clusters  
236 (Paired Student's T-test,  $p \leq 0.005$  uncorrected, minimal cluster size = 10 voxels). Therefore, the scans of  
237 both conditions were grouped to evaluate the effect of SalB on the BOLD signal. Upon SalB injection, the  
238 mean statistical AUC maps showed both significant BOLD signal decreases as well as increases (One  
239 sample Student's T-test,  $p \leq 0.005$ , minimal cluster size = 10 voxels, Figure 1). Decreased BOLD signals were  
240 observed as expected in the target region ACA, and in addition in Ins, left SS, left AUD/TEA and right VIS,  
241 while, increased BOLD signals were observed in the right RSP, right SS, right HIP and AN. The mean AUC  
242 values  $\pm$  SEM from all voxels in the brain regions demonstrating significant decreases or increases (One  
243 sample Student's T-test) are presented in Table 1.

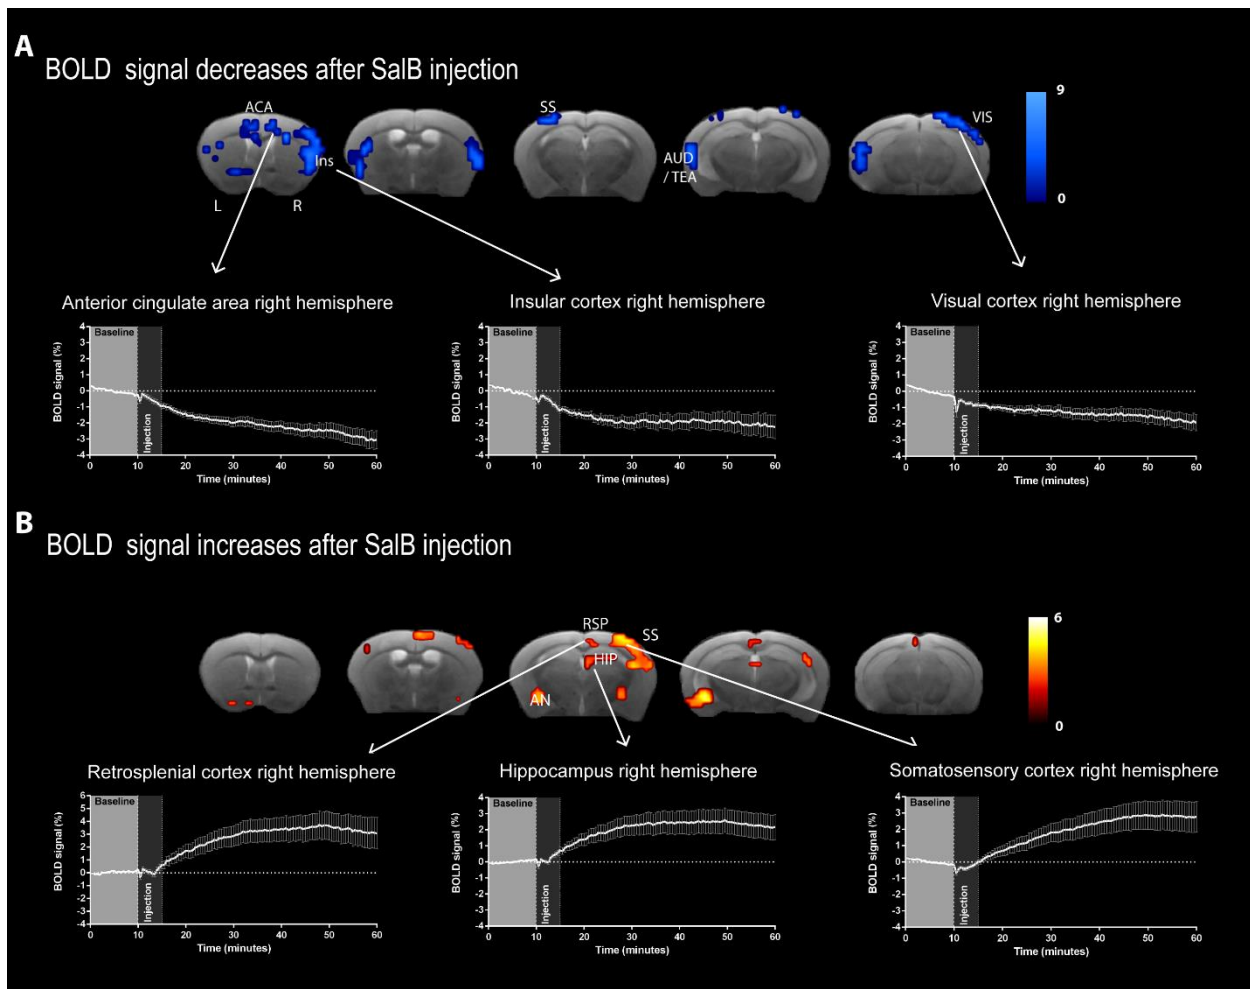

244 **Figure 1. Neural activity alterations upon neuronal inhibition in right ACA.** Mean statistical AUC maps  
245 in the KORD-expressing group are shown. A) Mean statistical AUC maps of the significantly decreased  
246 BOLD signals after SalB injection. Graphs show the BOLD signal timeseries of all significant voxels in the  
247 right ACA, right Ins and right VIS. B) Mean statistical AUC maps of significantly increased BOLD signals  
248 after SalB injection. Graphs show the percent BOLD signal change timeseries of all significant voxels in the  
249 right RSP, right HIP and right SS. One sample T-test,  $p \leq 0.005$ , minimal cluster size = 10 voxels.  
250 Abbreviations: anterior cingulate area (ACA), insular cortex (Ins), auditory cortex (AUD), temporal  
251 association cortex (TEA), visual cortex (VIS), retrosplenial cortex (RSP), amygdalar nuclei (AN),  
252 somatosensory cortex (SS), hippocampus (HIP).

| Hemisphere       | Brain region                                            | Mean AUC $\pm$ SEM |
|------------------|---------------------------------------------------------|--------------------|
| Left hemisphere  | Anterior cingulate area (ACA)                           | -1,3 $\pm$ 0,3     |
|                  | Insular cortex (Ins)                                    | -1,5 $\pm$ 0,4     |
|                  | Somatosensory cortex (SS)                               | -1,5 $\pm$ 0,3     |
|                  | Auditory cortex / temporal association cortex (AUD/TEA) | -2,1 $\pm$ 0,5     |
|                  | Amygdalar nucleus (AN)                                  | 3,0 $\pm$ 0,8      |
| Right hemisphere | Anterior cingulate area (ACA)                           | -1,2 $\pm$ 0,4     |
|                  | Insular cortex (Ins)                                    | -2,4 $\pm$ 0,5     |
|                  | Somatosensory cortex (SS)                               | 2,7 $\pm$ 0,7      |
|                  | Hippocampus (HIP)                                       | 2,0 $\pm$ 0,7      |
|                  | Retrosplenial cortex (RSP)                              | 2,5 $\pm$ 0,8      |
|                  | Visual cortex (VIS)                                     | -1,4 $\pm$ 0,3     |
|                  | Amygdalar nucleus (AN)                                  | 3,4 $\pm$ 1,0      |

253

254 **Table 1. Quantification of the area under the curve (AUC).** Table shows the mean AUC  $\pm$  SEM from the  
 255 extracted timecourses of the significant voxels of different ROIs, including anterior cingulate area (ACA),  
 256 insular cortex (Ins), somatosensory cortex (SS), auditory cortex (AUD) / temporal association cortex (TEA),  
 257 hippocampus (HIP), retrosplenial cortex (RSP), visual cortex (VIS), amygdalar nucleus (AN).

### 258 3.2 KORD-induced functional connectivity reductions

259 To evaluate how functional connectivity between different brain regions is changing during KORD-  
 260 induced inactivation of the ACA, we analyzed the rsfMRI scans that were collected ten minutes after the  
 261 injection of SalB. Seed-based analyses revealed that inhibition of the neurons in the right ACA significantly  
 262 decreased FC of the right and left ACA, right and left RSP, right SS, right and left VIS, right AUD, left HIP  
 263 and right and left Thal (Paired Student's T-test, Figure 2). Furthermore, interhemispheric FC was assessed  
 264 between homologous ROIs in both hemispheres. Significantly decreased interhemispheric FC was  
 265 measured for the RSP, SS and VIS (Paired Student's T-test, Figure 3).

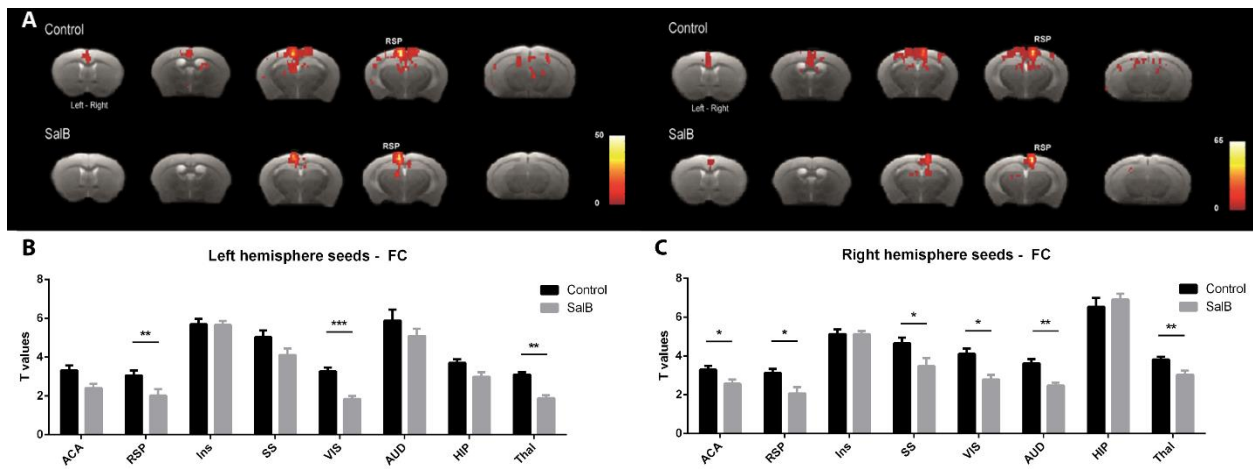

266

267 **Figure 2. Functional connectivity alterations due to inhibition of the right ACA.** A) Statistical FC maps of  
 268 the RSP as seed region after vehicle injection (control) and SalB injection (One sample T-test,  $p \leq 0.001$   
 269 uncorrected, minimal cluster size 10 voxels). B + C) Bar graphs show the quantification of the mean T-  
 270 values  $\pm$  SEM, i.e. FC strength, for all seed regions (anterior cingulate area (ACA), retrosplenial cortex (RSP),  
 271 insular cortex (Ins), visual cortex (VIS), somatosensory cortex (SS), auditory cortex (AUD), hippocampus  
 272 (HIP) and thalamus (Thal)); Paired Student's T-test). \*  $p \leq 0.05$ , \*\*  $p \leq 0.01$ , \*\*\*  $p \leq 0.001$ .

273

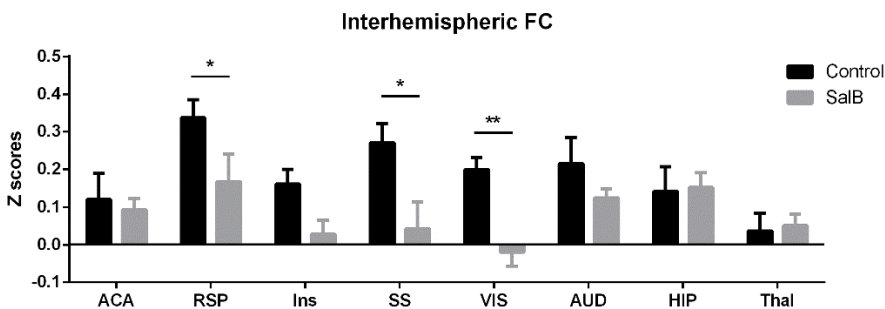

274

275 **Figure 3. Inhibition of the right ACA induced decreased interhemispheric functional connectivity.** Bar  
 276 graphs show mean Z-scores  $\pm$  SEM of all brain regions (anterior cingulate area (ACA), retrosplenial cortex

277 (RSP), insular cortex (Ins), visual cortex (VIS), somatosensory cortex (SS), auditory cortex (AUD),  
278 hippocampus (HIP) and thalamus (Thal); Paired Student's T-test). \*  $p \leq 0.05$ , \*\*  $p \leq 0.01$ ).

### 279 **3.3 Physiological parameters**

280 To exclude potential physiological effects of SalB and/or DMSO injections. The breathing rate was  
281 recorded during all *in vivo* imaging procedures. The breathing rates were compared across all groups to  
282 evaluate whether observed neuronal activity and FC changes are influenced by alterations of the animals'  
283 physiological condition. As such, breathing rates were compared between the sham-treated group and  
284 the KORD-expressing group for the pHMRI scans and between the two rsfMRI scan sessions, i.e. upon  
285 vehicle injection and SalB injection, in the KORD-expressing group. The breathing rate in the sham group  
286 (mean  $\pm$  SEM: (155  $\pm$  7) breaths per minute) did not significantly differ from the breathing rate of the  
287 KORD-expressing mice (mean  $\pm$  SEM: (160  $\pm$  4) breaths per minute; two-sample Student's T-test,  $p=0.4$ ).  
288 Furthermore, the injected SalB concentration did not significantly influence the breathing rate in the KORD  
289 – expressing mice (mean  $\pm$  SEM (160  $\pm$  4) breaths per minute with 3 mg/kg SalB injection and (165  $\pm$  3)  
290 breaths per minute with 6 mg/kg SalB injection; Paired Student's T-test  $p=0.4$ ). In addition, no significant  
291 difference could be observed in the breathing rate between the two rsfMRI scan sessions in the KORD-  
292 expressing group (mean  $\pm$  SEM: (157  $\pm$  7) breaths per minute after vehicle injection and (158  $\pm$  23) breaths  
293 per minute after SalB injection; Paired Student's T-test,  $p=0.9$ ).

### 294 **4. Discussion**

295 In this study, inhibitory chemogenetics were combined with non-invasive functional MRI to evaluate the  
296 effects of neuronal inhibition in the ACA on whole-brain neuronal activity and FC. Inhibitory KORD were  
297 expressed in the right ACA of mice, after which pHMRI scans and rsfMRI scans were acquired. The pHMRI  
298 results showed that inhibition of the neurons in the right ACA induced BOLD signal decreases as well as  
299 BOLD signal increases. Significantly decreased BOLD signals were observed in the target region, i.e. right

300 ACA, as well as in the left ACA, right and left INS, left SS, right VIS and left AUD. On the other hand,  
301 increased BOLD signals were measured in the right SS, right and left AN, right RSP and right HIP. We further  
302 hypothesized that inhibition can induce desynchronization of neuronal firing which can lead to disrupted  
303 FC. Indeed, significantly decreased FC was observed for the ACA, RSP, SS, VIS, AUD and HIP. Histological  
304 examination of the brains, using uDISCO clearing and light-sheet microscopy, revealed KORD expression  
305 in the target region and structurally connected brain regions.

306 ***4.1 Neuronal inhibition of the right anterior cingulate area induced altered BOLD responses***  
307 ***throughout the brain***

308 The KORD-induced inhibition of the right ACA caused significant modulations in the BOLD signals in the  
309 ACA as well as inter-connected brain regions. A study has previously demonstrated that chemogenetic-  
310 induced neural activity modulations could be observed using pHMRI in the mesocorticolimbic system [24].  
311 To the best of our knowledge, the study presented here shows for the first time whole-brain network  
312 activity modulations upon the combined use of KORD-induced neuronal inhibition and pHMRI in mice.  
313 This approach allowed us to gain a better understanding of the importance of a preserved neuronal  
314 activity in the ACA for whole-brain network activity and connectivity.

315 Although the exact function of the ACA is not yet fully known, several tracer injection studies have shown  
316 its involvement in various networks. The ACA has been shown to mediate the transfer of information  
317 between sensory areas, such as the somatosensory, visual and auditory cortices, and to higher order brain  
318 regions including the prefrontal cortex [34]. This suggests that the ACA is implicated in movement  
319 orientation and coordination of the eyes, head and body in object searching and spatial navigation. These  
320 connections of the ACA with sensory regions could also be observed in our KORD-pHMRI results. As such,  
321 decreased BOLD signals were measured in the right visual cortex and left auditory cortex and increased  
322 BOLD signals were observed in the right somatosensory cortex. Furthermore, it has been shown that the



323 ACA also receives information from the subiculum and transmits it to other prefrontal areas and it is  
324 suggested to be part of a network supporting spatial orientation and episodic memory [4, 34].  
325 Furthermore, previous tracer injection studies have shown that the ACA has reciprocal connections with  
326 the retrosplenial cortex, visual cortex as well as with thalamic nuclei [35]. This is fully consistent with the  
327 observed BOLD signal alterations in these brain regions after inhibition of the ACA in our study. However,  
328 given that MRI is only an indirect measure of neuronal activity, and is unable to differentiate between  
329 excitatory and inhibitory cell types, future research will be necessary in order to clarify the contributions  
330 of specific cell classes in mediating the BOLD signal alterations.

#### 331 ***4.2 Neuronal inhibition of the right anterior cingulate area induced whole-brain functional*** 332 ***connectivity decreases***

333 In this study, rsfMRI showed decreased FC in different networks during inactivation of the ACA. Previous  
334 human brain imaging studies used graph-theory based methods to identify a set of brain regions that play  
335 a central role in the functional topology of the human brain. These regions include cingulate cortex, insular  
336 cortex, frontal cortex, temporal cortex and the posterior cortex [36-38]. Similarly, Liska et al [39] found  
337 high strength nodes in the mouse brain including the cingulate cortex and the prefrontal cortex. This might  
338 explain the results in our study, as the inhibition of the ACA resulted in decreased FC in various brain  
339 regions. By evaluating the FC of both unilateral and contralateral seeds, we could assess whether the  
340 effect of KORD-mediated neuronal inhibition is localized in the ipsilateral, affected hemisphere or is also  
341 spreading to the contralateral side. Our findings demonstrated FC alterations in both the ipsilateral and  
342 contralateral hemisphere. We observed decreased FC for brain regions that are known to be structurally  
343 connected with the ACA (see above). This is in line with the emerging view that functional correlations in  
344 spontaneous brain activity are guided by underlying anatomical connections [14, 39]. The decreased FC  
345 can thus be due to neuronal firing desynchronization mediated by disturbed inputs coming from the ACA.  
346 We conjecture that the disruption of this hub region, with high connection strength and high degree of

347 structural connectivity, leads to widespread alterations in the integrity of the correlations between brain  
348 networks and highlights the importance of hub node integrity in the dynamics of the whole network.

## 349 **5. Conclusion**

350 Our study demonstrates the ability of the combined use of KORD with *in vivo* MRI to assess large-scale  
351 network activity and FC in response to inhibition of a hub region, namely the right ACA in the mouse brain.  
352 We showed that KORD-induced inhibition of this area could induce BOLD signal decreases and increases  
353 in connected brain regions throughout both hemispheres. The affected brain regions are in line with  
354 previous tracer injection studies demonstrating projection areas of the ACA in mice. Furthermore, these  
355 connected brain regions showed decreased FC measures. To conclude, our study identifies the DREADD  
356 technology as a valuable and reliable tool that can be used in combination with non-invasive imaging  
357 methods. This approach might be of significant value for future neuroscientific research trying to unravel  
358 the underlying mechanisms of the function and dysfunction of neuronal networks.

## 359 **Funding source declaration**

360 This research was supported by the fund of scientific research Flanders (FWO G048917N), Baekeland grant  
361 (IWT140775) and the University Research Fund of University of Antwerp (BOF DOCPRO FFB150340).  
362 Stephan Missault is a postdoctoral fellow of the fund of scientific research Flanders (FWO) (12W1619N).

363

364

365

366

367

368 **References**

369

- 370 1. Koike, H., M.P. Demars, J.A. Short, E.M. Nabel, S. Akbarian, M.G. Baxter, and H. Morishita,  
371 *Chemogenetic Inactivation of Dorsal Anterior Cingulate Cortex Neurons Disrupts Attentional*  
372 *Behavior in Mouse*, in *Neuropsychopharmacology*. 2016. p. 1014-23. DOI:  
373 10.1038/npp.2015.229.
- 374 2. Diaz-Tejero, R., F. Maduell, J. Diez, N. Esparza, P. Errasti, A. Purroy, and J. Pardo, *Loss of renal*  
375 *graft due to recurrent IgA nephropathy with rapidly progressive course: an unusual clinical*  
376 *evolution*, in *Nephron*. 1990. p. 341-3. DOI: 10.1159/000185892.
- 377 3. Kim, J., E.A. Wasserman, L. Castro, and J.H. Freeman, *Anterior cingulate cortex inactivation*  
378 *impairs rodent visual selective attention and prospective memory*, in *Behav Neurosci*. 2016. p.  
379 75-90. DOI: 10.1037/bne0000117.
- 380 4. Ding, H.K., C.M. Teixeira, and P.W. Frankland, *Inactivation of the anterior cingulate cortex blocks*  
381 *expression of remote, but not recent, conditioned taste aversion memory*, in *Learn Mem*. 2008.  
382 p. 290-3. DOI: 10.1101/lm.905008.
- 383 5. Weible, A.P., *Remembering to attend: the anterior cingulate cortex and remote memory*, in  
384 *Behav Brain Res*. 2013. p. 63-75. DOI: 10.1016/j.bbr.2013.02.010.
- 385 6. Paus, T., *Primate anterior cingulate cortex: where motor control, drive and cognition interface*, in  
386 *Nat Rev Neurosci*. 2001. p. 417-24. DOI: 10.1038/35077500.
- 387 7. Fuchs, P.N., Y.B. Peng, J.A. Boyette-Davis, and M.L. Uhelski, *The anterior cingulate cortex and*  
388 *pain processing*, in *Front Integr Neurosci*. 2014. p. 35. DOI: 10.3389/fnint.2014.00035.
- 389 8. Nordquist, R.E., C.M. Pennartz, H.B. Uylings, R.N. Joosten, A.J. Jonker, H.J. Groenewegen, and P.  
390 Voorn, *C-fos activation patterns in rat prefrontal cortex during acquisition of a cued classical*  
391 *conditioning task*, in *Behav Brain Res*. 2003. p. 65-75.
- 392 9. Vogt, B.A. and G. Paxinos, *Cytoarchitecture of mouse and rat cingulate cortex with human*  
393 *homologies*, in *Brain Struct Funct*. 2014. p. 185-92. DOI: 10.1007/s00429-012-0493-3.
- 394 10. Vogt, B.A., P.R. Hof, K. Zilles, L.J. Vogt, C. Herold, and N. Palomero-Gallagher, *Cingulate area 32*  
395 *homologies in mouse, rat, macaque and human: cytoarchitecture and receptor architecture*, in *J*  
396 *Comp Neurol*. 2013. p. 4189-204. DOI: 10.1002/cne.23409.
- 397 11. Ma, Z., P. Perez, Z. Ma, Y. Liu, C. Hamilton, Z. Liang, and N. Zhang, *Functional atlas of the awake*  
398 *rat brain: A neuroimaging study of rat brain specialization and integration*, in *Neuroimage*. 2018.  
399 p. 95-112. DOI: 10.1016/j.neuroimage.2016.07.007.
- 400 12. Gozzi, A. and A.J. Schwarz, *Large-scale functional connectivity networks in the rodent brain*, in  
401 *Neuroimage*. 2016. p. 496-509. DOI: 10.1016/j.neuroimage.2015.12.017.
- 402 13. Sforzazzini, F., A.J. Schwarz, A. Galbusera, A. Bifone, and A. Gozzi, *Distributed BOLD and CBV-*  
403 *weighted resting-state networks in the mouse brain*, in *Neuroimage*. 2014. p. 403-15. DOI:  
404 10.1016/j.neuroimage.2013.09.050.
- 405 14. Risch, D., M. Castellote, C.W. Clark, G.E. Davis, P.J. Dugan, L.E. Hodge, A. Kumar, K. Lucke, D.K.  
406 Mellinger, S.L. Nieukirk, et al., *Seasonal migrations of North Atlantic minke whales: novel*  
407 *insights from large-scale passive acoustic monitoring networks*, in *Mov Ecol*. 2014. p. 24. DOI:  
408 10.1186/s40462-014-0024-3.
- 409 15. Cao, Q., Y. Zang, L. Sun, M. Sui, X. Long, Q. Zou, and Y. Wang, *Abnormal neural activity in children*  
410 *with attention deficit hyperactivity disorder: a resting-state functional magnetic resonance*  
411 *imaging study*, in *Neuroreport*. 2006. p. 1033-6. DOI: 10.1097/01.wnr.0000224769.92454.5d.
- 412 16. Greicius, M., *Resting-state functional connectivity in neuropsychiatric disorders*, in *Curr Opin*  
413 *Neurol*. 2008. p. 424-30. DOI: 10.1097/WCO.0b013e328306f2c5.

- 414 17. Boksman, K., J. Theberge, P. Williamson, D.J. Drost, A. Malla, M. Densmore, J. Takhar, W.  
415 Pavlosky, R.S. Menon, and R.W. Neufeld, *A 4.0-T fMRI study of brain connectivity during word*  
416 *fluency in first-episode schizophrenia*, in *Schizophr Res.* 2005. p. 247-63. DOI:  
417 10.1016/j.schres.2004.09.025.
- 418 18. Chepenik, L.G., M. Raffo, M. Hampson, C. Lacadie, F. Wang, M.M. Jones, B. Pittman, P.  
419 Skudlarski, and H.P. Blumberg, *Functional connectivity between ventral prefrontal cortex and*  
420 *amygdala at low frequency in the resting state in bipolar disorder*, in *Psychiatry Res.* 2010. p.  
421 207-10. DOI: 10.1016/j.psychres.2010.04.002.
- 422 19. Gai, Y., J. Zhao, L. Song, L. Wang, L. Qiu, X. Ning, X. Zheng, Y. Zhang, C. Mu, Y. Zhang, et al., *Two*  
423 *thymosin-repeated molecules with structural and functional diversity coexist in Chinese mitten*  
424 *crab Eriocheir sinensis*, in *Dev Comp Immunol.* 2009. p. 867-76. DOI: 10.1016/j.dci.2009.02.003.
- 425 20. Hahn, A., P. Stein, C. Windischberger, A. Weissenbacher, C. Spindelegger, E. Moser, S. Kasper,  
426 and R. Lanzenberger, *Reduced resting-state functional connectivity between amygdala and*  
427 *orbitofrontal cortex in social anxiety disorder*, in *Neuroimage.* 2011. p. 881-9. DOI:  
428 10.1016/j.neuroimage.2011.02.064.
- 429 21. Bonnelle, V., R. Leech, K.M. Kinnunen, T.E. Ham, C.F. Beckmann, X. De Boissezon, R.J.  
430 Greenwood, and D.J. Sharp, *Default mode network connectivity predicts sustained attention*  
431 *deficits after traumatic brain injury*, in *J Neurosci.* 2011. p. 13442-51. DOI:  
432 10.1523/JNEUROSCI.1163-11.2011.
- 433 22. Mayer, A.R., M.V. Mannell, J. Ling, C. Gasparovic, and R.A. Yeo, *Functional connectivity in mild*  
434 *traumatic brain injury*, in *Hum Brain Mapp.* 2011. p. 1825-35. DOI: 10.1002/hbm.21151.
- 435 23. Giorgi, A., S. Migliarini, A. Galbusera, G. Maddaloni, M. Mereu, G. Margiani, M. Gritti, S. Landi, F.  
436 Trovato, S.M. Bertozzi, et al., *Brain-wide Mapping of Endogenous Serotonergic Transmission via*  
437 *Chemogenetic fMRI*, in *Cell Rep.* 2017. p. 910-918. DOI: 10.1016/j.celrep.2017.09.087.
- 438 24. Roelofs, T.J.M., J.P.H. Verharen, G.A.F. van Tilborg, L. Boekhoudt, A. van der Toorn, J.W. de Jong,  
439 M.C.M. Luijendijk, W.M. Otte, R.A.H. Adan, and R.M. Dijkhuizen, *A novel approach to map*  
440 *induced activation of neuronal networks using chemogenetics and functional neuroimaging in*  
441 *rats: A proof-of-concept study on the mesocorticolimbic system*, in *Neuroimage.* 2017. p. 109-  
442 118. DOI: 10.1016/j.neuroimage.2017.05.021.
- 443 25. Grayson, D.S., E. Bliss-Moreau, C.J. Machado, J. Bennett, K. Shen, K.A. Grant, D.A. Fair, and D.G.  
444 Amaral, *The Rhesus Monkey Connectome Predicts Disrupted Functional Networks Resulting from*  
445 *Pharmacogenetic Inactivation of the Amygdala*, in *Neuron.* 2016. p. 453-66. DOI:  
446 10.1016/j.neuron.2016.06.005.
- 447 26. Vardy, E., J.E. Robinson, C. Li, R.H.J. Olsen, J.F. DiBerto, P.M. Giguere, F.M. Sassano, X.P. Huang,  
448 H. Zhu, D.J. Urban, et al., *A New DREADD Facilitates the Multiplexed Chemogenetic Interrogation*  
449 *of Behavior*, in *Neuron.* 2015. p. 936-946. DOI: 10.1016/j.neuron.2015.03.065.
- 450 27. Grandjean, J., A. Schroeter, I. Batata, and M. Rudin, *Optimization of anesthesia protocol for*  
451 *resting-state fMRI in mice based on differential effects of anesthetics on functional connectivity*  
452 *patterns*, in *Neuroimage.* 2014. p. 838-47. DOI: 10.1016/j.neuroimage.2014.08.043.
- 453 28. Hooker, J.M., T.A. Munro, C. Beguin, D. Alexoff, C. Shea, Y. Xu, and B.M. Cohen, *Salvinorin A and*  
454 *derivatives: protection from metabolism does not prolong short-term, whole-brain residence*, in  
455 *Neuropharmacology.* 2009. p. 386-91. DOI: 10.1016/j.neuropharm.2009.06.044.
- 456 29. Penazzi, L., J. Lorengel, F. Sundermann, N. Golovyashkina, S. Marre, C.M.B. Mathis, L.  
457 Lewejohann, R. Brandt, and L. Bakota, *DMSO modulates CNS function in a preclinical Alzheimer's*  
458 *disease model*, in *Neuropharmacology.* 2017. p. 434-444. DOI:  
459 10.1016/j.neuropharm.2016.10.020.

- 460 30. Pan, C., R. Cai, F.P. Quacquarelli, A. Ghasemigharagoz, A. Loubopoulos, P. Matryba, N. Plesnila,  
461 M. Dichgans, F. Hellal, and A. Erturk, *Shrinkage-mediated imaging of entire organs and*  
462 *organisms using uDISCO*, in *Nat Methods*. 2016. p. 859-67. DOI: 10.1038/nmeth.3964.
- 463 31. Detrez, J.R., H. Maurin, K. Van Kolen, R. Willems, J. Colombelli, B. Lechat, B. Roucourt, F. Van  
464 Leuven, S. Baatout, P. Larsen, et al., *Regional vulnerability and spreading of*  
465 *hyperphosphorylated tau in seeded mouse brain*, in *Neurobiol Dis*. 2019. p. 398-409. DOI:  
466 10.1016/j.nbd.2019.03.010.
- 467 32. Klein, S., M. Staring, K. Murphy, M.A. Viergever, and J.P. Pluim, *elastix: a toolbox for intensity-*  
468 *based medical image registration*, in *IEEE Trans Med Imaging*. 2010. p. 196-205. DOI:  
469 10.1109/TMI.2009.2035616.
- 470 33. Zhao, B., K. Bhuripanyo, J. Schneider, K. Zhang, H. Schindelin, D. Boone, and J. Yin, *Specificity of*  
471 *the E1-E2-E3 enzymatic cascade for ubiquitin C-terminal sequences identified by phage display*,  
472 in *ACS Chem Biol*. 2012. p. 2027-35. DOI: 10.1021/cb300339p.
- 473 34. Zingg, B., H. Hintiryan, L. Gou, M.Y. Song, M. Bay, M.S. Bienkowski, N.N. Foster, S. Yamashita, I.  
474 Bowman, A.W. Toga, et al., *Neural networks of the mouse neocortex*, in *Cell*. 2014. p. 1096-111.  
475 DOI: 10.1016/j.cell.2014.02.023.
- 476 35. Zhang, S., M. Xu, W.C. Chang, C. Ma, J.P. Hoang Do, D. Jeong, T. Lei, J.L. Fan, and Y. Dan,  
477 *Organization of long-range inputs and outputs of frontal cortex for top-down control*, in *Nat*  
478 *Neurosci*. 2016. p. 1733-1742. DOI: 10.1038/nn.4417.
- 479 36. Cole, M.W., S. Pathak, and W. Schneider, *Identifying the brain's most globally connected regions*,  
480 in *Neuroimage*. 2010. p. 3132-48. DOI: 10.1016/j.neuroimage.2009.11.001.
- 481 37. Sporns, O., *Network attributes for segregation and integration in the human brain*, in *Curr Opin*  
482 *Neurobiol*. 2013. p. 162-71. DOI: 10.1016/j.conb.2012.11.015.
- 483 38. van den Heuvel, M.P. and O. Sporns, *Network hubs in the human brain*, in *Trends Cogn Sci*. 2013.  
484 p. 683-96. DOI: 10.1016/j.tics.2013.09.012.
- 485 39. Liska, A., A. Galbusera, A.J. Schwarz, and A. Gozzi, *Functional connectivity hubs of the mouse*  
486 *brain*, in *Neuroimage*. 2015. p. 281-91. DOI: 10.1016/j.neuroimage.2015.04.033.

487

488

489

490

491

492

493

494
